# Supplementary material for: A Biodegradable Copolyester, Poly(butylene succinate-co-ε-caprolactone), as a High Efficiency Matrix Former for Controlled Release of Drugs
Source: MDPI journal article supplement (doi:10.3390/pharmaceutics13071057), 2021-07-10
Supplement: s1 [file s1]

# Supplementary Materials: A Biodegradable Copolyester, Poly(Butylene Succinate-*co*- $\epsilon$ -Caprolactone), as High Efficiency Matrix Former for Controlled Release of Drugs

Eduardo Galdón, Mónica Millán-Jiménez, Gloria Mora-Castaño, Antxon Martínez de Ilarduya and Isidoro Caraballo

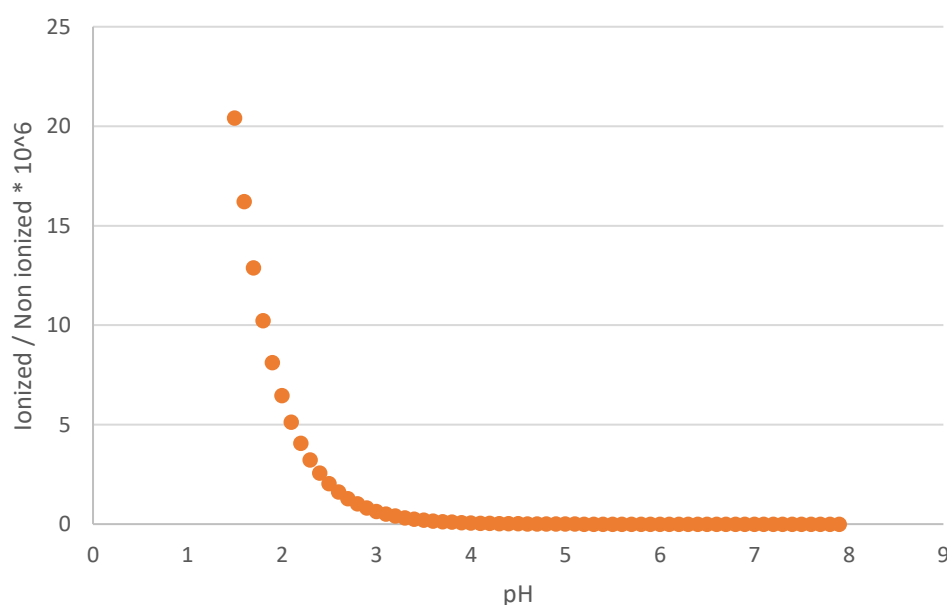

**Figure S1.** Theophylline distribution of ionized/non ionized form.

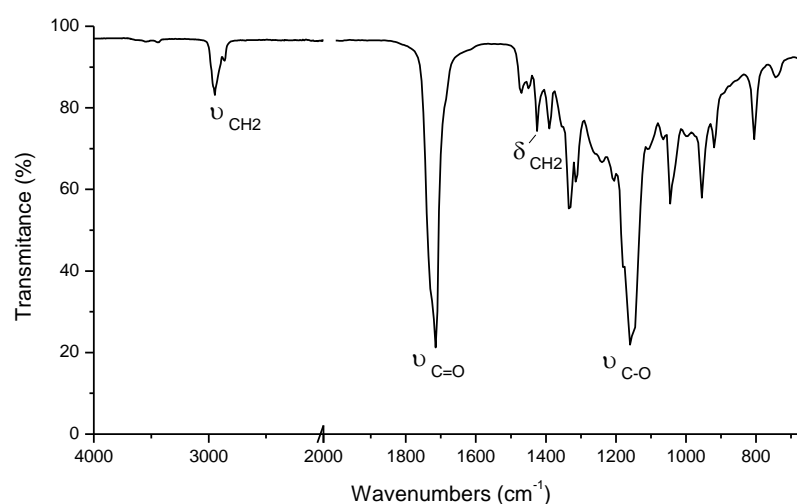

**Figure S2.** FTIR spectrum of PBS\_CL copolyester with main absorption bands assigned to stretching ( $\nu$ ) and bending ( $\delta$ ) modes of different functional groups.

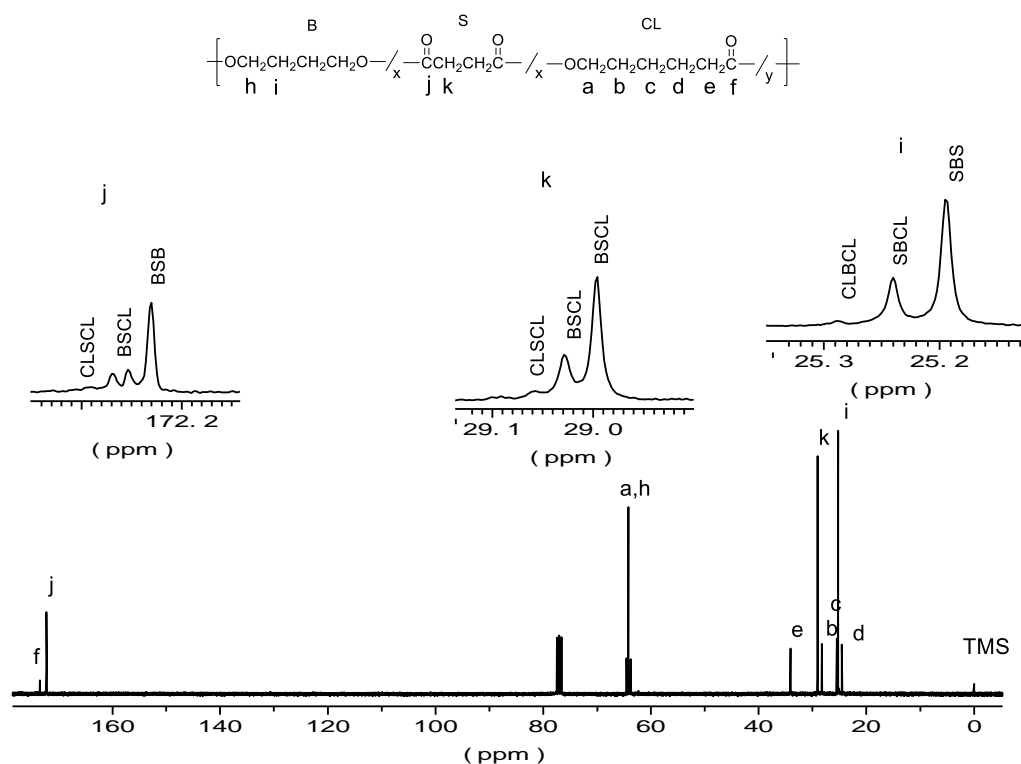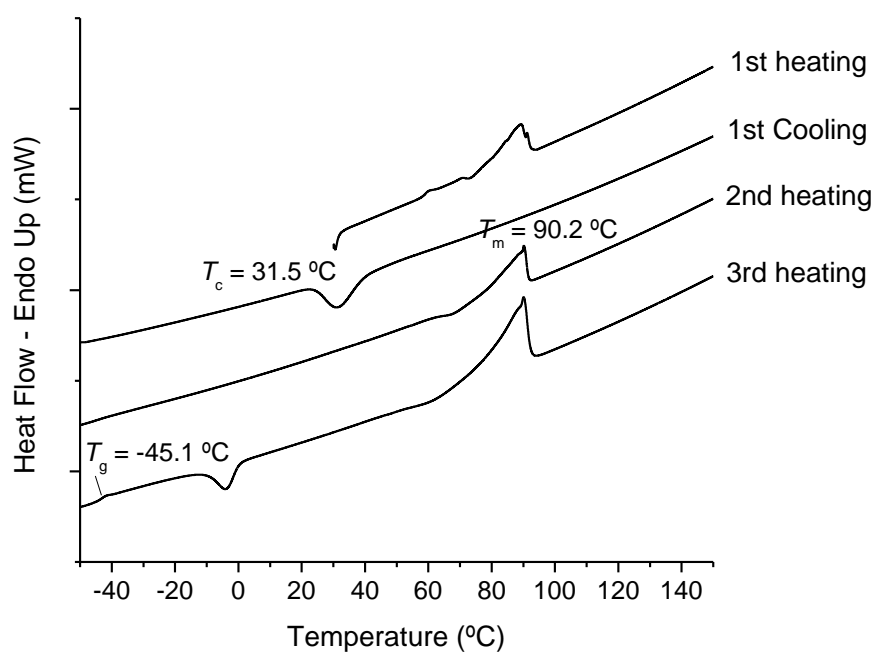

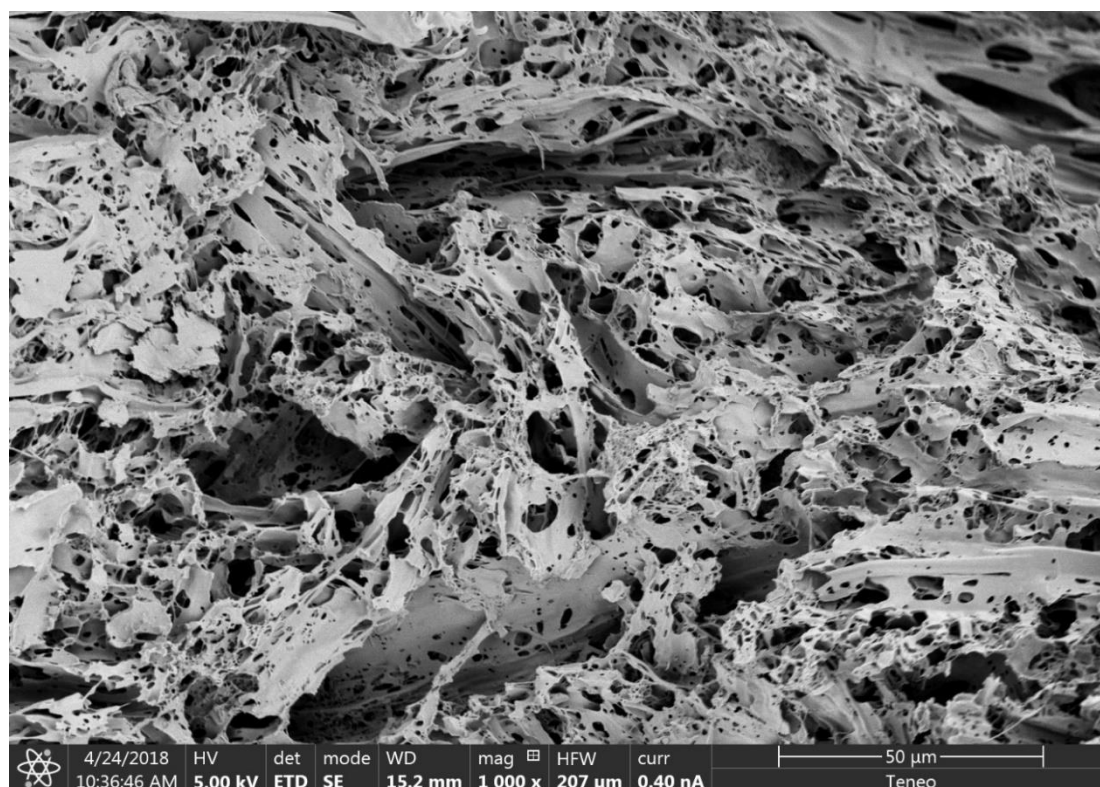

**Figure S5.** High resolution SEM image of PBS\_CL tablets obtained by USAC (23:77 % v/v) after drug release. Detail of the nanostructured matrix at 1000x.

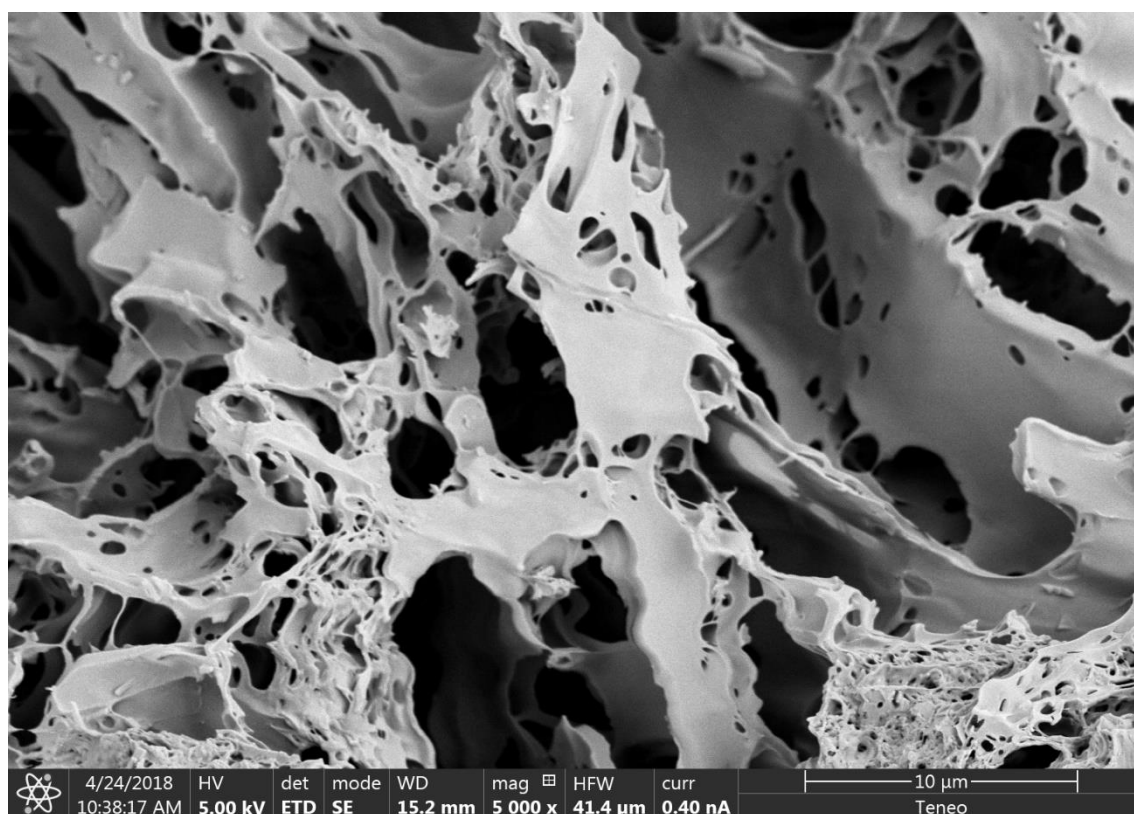

**Figure S6.** High resolution SEM image of PBS\_CL tablets obtained by USAC (23:77 % v/v) after drug release. Detail of the nanostructured matrix at 5000x.

**Table S1.** Molecular weights of PBS\_CL copolyester.

| Copolymer | NMR                       |                           | GPC                       |          |
|-----------|---------------------------|---------------------------|---------------------------|----------|
|           | M <sub>n</sub><br>(g/mol) | M <sub>n</sub><br>(g/mol) | M <sub>w</sub><br>(g/mol) | <i>D</i> |
| PBS_CL    | 21500                     | 24300                     | 51400                     | 2.1      |

**Table S2.** Composition and microstructure of PBS\_CL copolyester.

| Copolymer | Composition<br>(BS/CL mol/mol) |           | Microstructure<br>(B-centered triad content) |      |      |      |
|-----------|--------------------------------|-----------|----------------------------------------------|------|------|------|
|           | Feed                           | Polymer   | CLBCL                                        | CLBS | SBS  | R    |
| PBS_CL    | 70/30                          | 73,2/26,8 | 2.8                                          | 27.7 | 69.7 | 1.07 |

**Table S3.** TGA parameters of PBS\_CL copolyester.

| Copolymer | <sup>o</sup> T <sub>d</sub> 10% (°C) | max T <sub>d</sub> (°C) | R <sub>w</sub> (%) |
|-----------|--------------------------------------|-------------------------|--------------------|
| PBS_CL    | 360                                  | 403                     | 1,3                |

**Table S4.** Thermal properties of PBS\_CL copolyester after the first heating run.

| Copolymer | T <sub>g</sub> (°C) | T <sub>c</sub> (°C) | T <sub>m</sub> (°C) | T <sub>cc</sub> (°C) | ΔH <sub>m</sub> (J/g) |
|-----------|---------------------|---------------------|---------------------|----------------------|-----------------------|
| PBS_CL    | -45.1               | 31.5                | 90.2                | -3.9                 | 51.5                  |
